# Supplementary material for: Neurotrophic Factors in Experimental Cerebral Acanthamoebiasis
Source: MDPI journal article supplement (doi:10.3390/ijms23094931), 2022-04-29
Supplement: s1 [file s1]

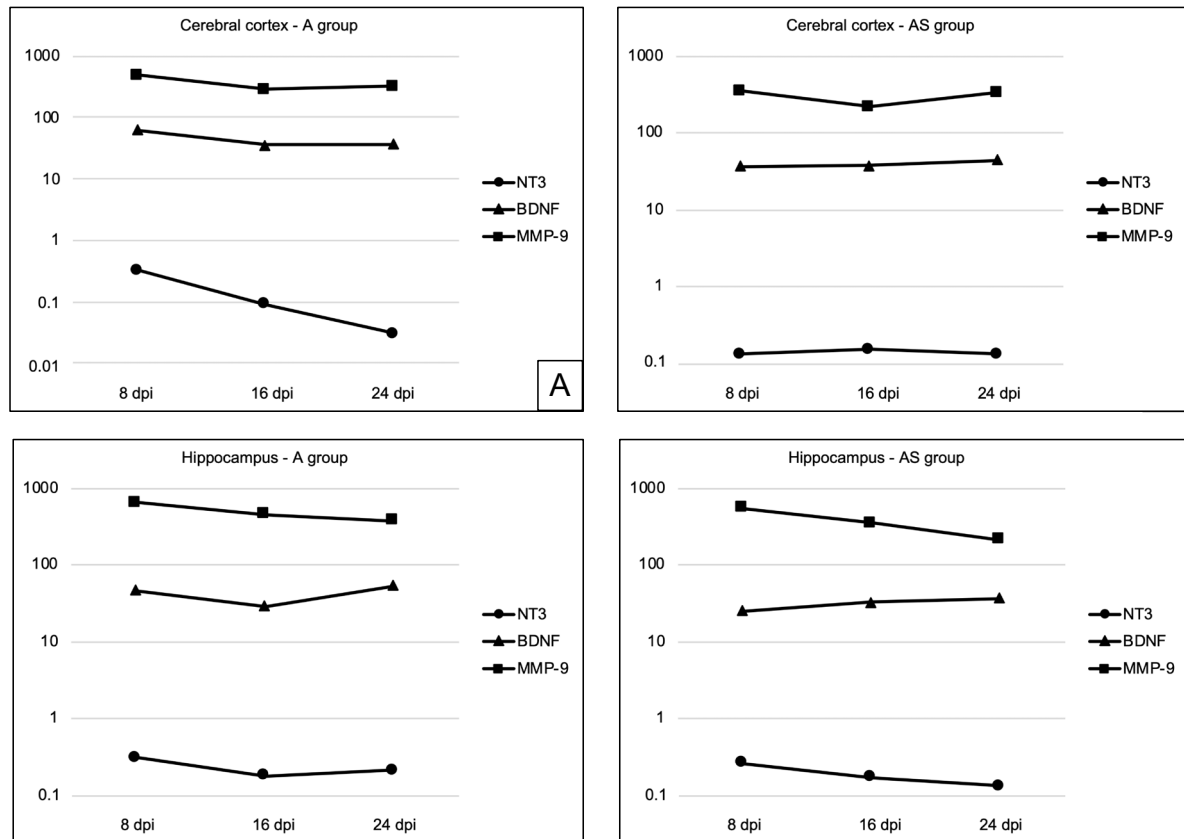

**Figure S1.** Concentration of neurotrophin 3 (NT3), brain-derived neurotrophic factor (BDNF) [present study] and matrix metalloproteinase 9 (MMP-9) [Łanocha-Arendarczyk et al. 2018] in the cerebral cortex of immunocompetent (A) and immunosuppressed mice (B) infected with *Acanthamoeba* spp. as well as in the hippocampus of immunocompetent (C) and immunosuppressed mice (D) infected with *Acanthamoeba* spp. in different days post infection (dpi)
